# Supplementary material for: Insulin resistance and white adipose tissue inflammation are uncoupled in energetically challenged Fsp27-deficient mice
Source: Nat Commun. 2015 Jan 7;6:5949. doi: 10.1038/ncomms6949 (PMC4354252; doi:10.1038/ncomms6949)
Supplement: Supplementary Information — Supplementary Figures 1-8 and Supplementary Tables 1-3 [file ncomms6949-s1.pdf]

Supplementary Figure 1

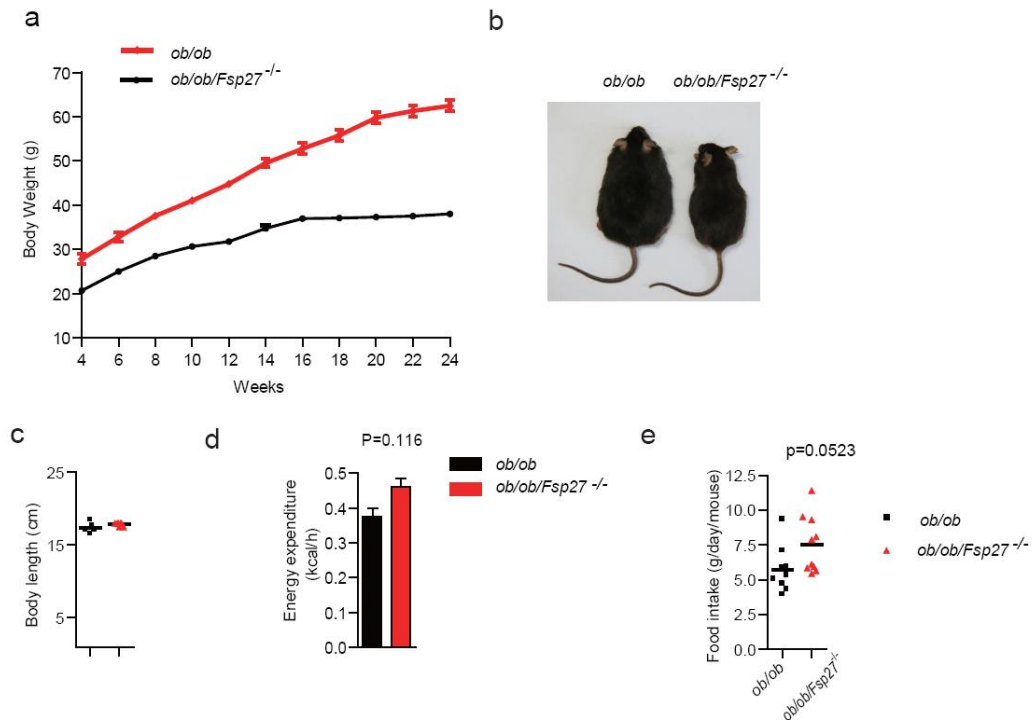

**Supplementary Figure 1: Food intake and energy expenditure of *ob/ob* and *ob/ob/Fsp27<sup>-/-</sup>* mice.** 4 month old chow fed *ob/ob* and *ob/ob/Fsp27<sup>-/-</sup>* mice were used for the analyses represented in panels b-e. (a) Growth curves demonstrating changes in body weight of *ob/ob* and *ob/ob/Fsp27<sup>-/-</sup>* mice (n=4). (b) Representative photographs of an *ob/ob* and *ob/ob/Fsp27<sup>-/-</sup>* mouse. (c) Body length of the *ob/ob* (n=5) and *ob/ob/Fsp27<sup>-/-</sup>* (n=7) mice. (d) Energy expenditure of the *ob/ob* and *ob/ob/Fsp27<sup>-/-</sup>* mice (n=4 per group). (e) Food intake of *ob/ob* (n=9) and *ob/ob/Fsp27<sup>-/-</sup>* (n=10) mice. Quantitative data are presented as mean  $\pm$  SEM. Significance was determined using a 2-tailed Student's t test.

Supplementary Figure 2

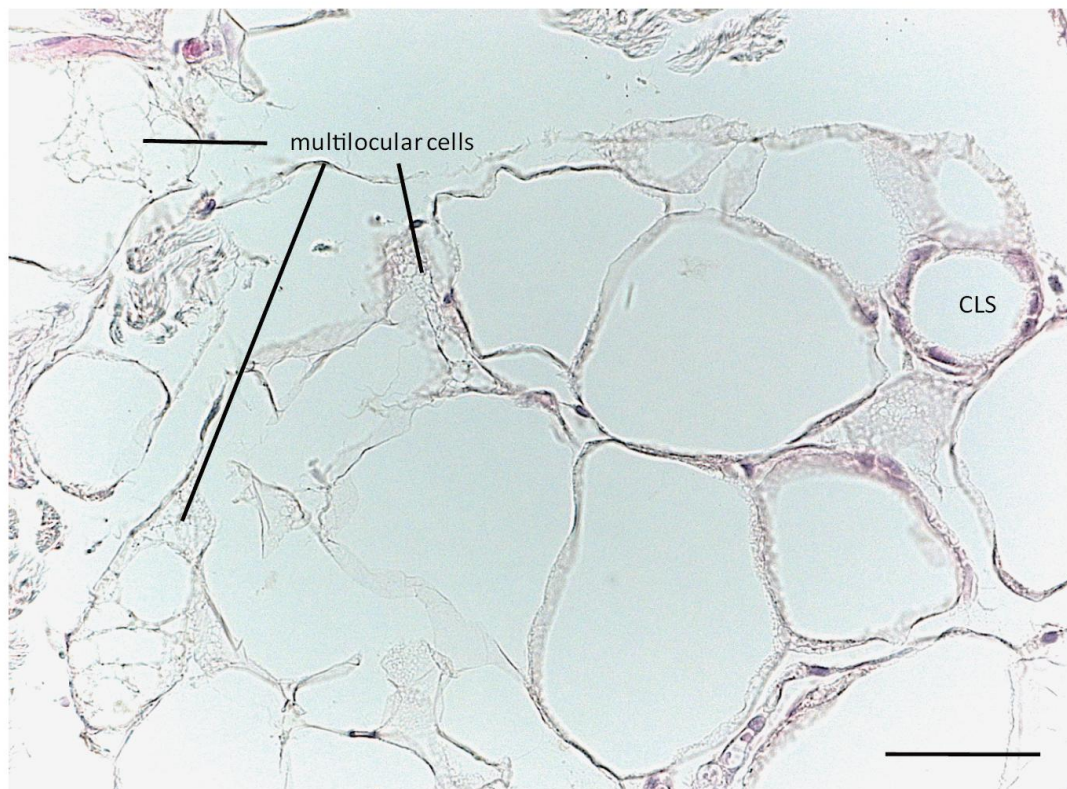

**Supplementary Figure 2: Crown-like structures in white adipose tissue of the CIDEc E186X patient.** An axillary fat sample from a patient previously reported to have a homozygous loss-of-function mutation (E186X) in CIDEc. Histological analysis shows a mixed population of uni- and multi-locular (highlighted with black arrows) white adipocytes with a single crown-like structure (CLS) in this section. Scale bar= 50  $\mu$ m.

### Supplementary Figure 3

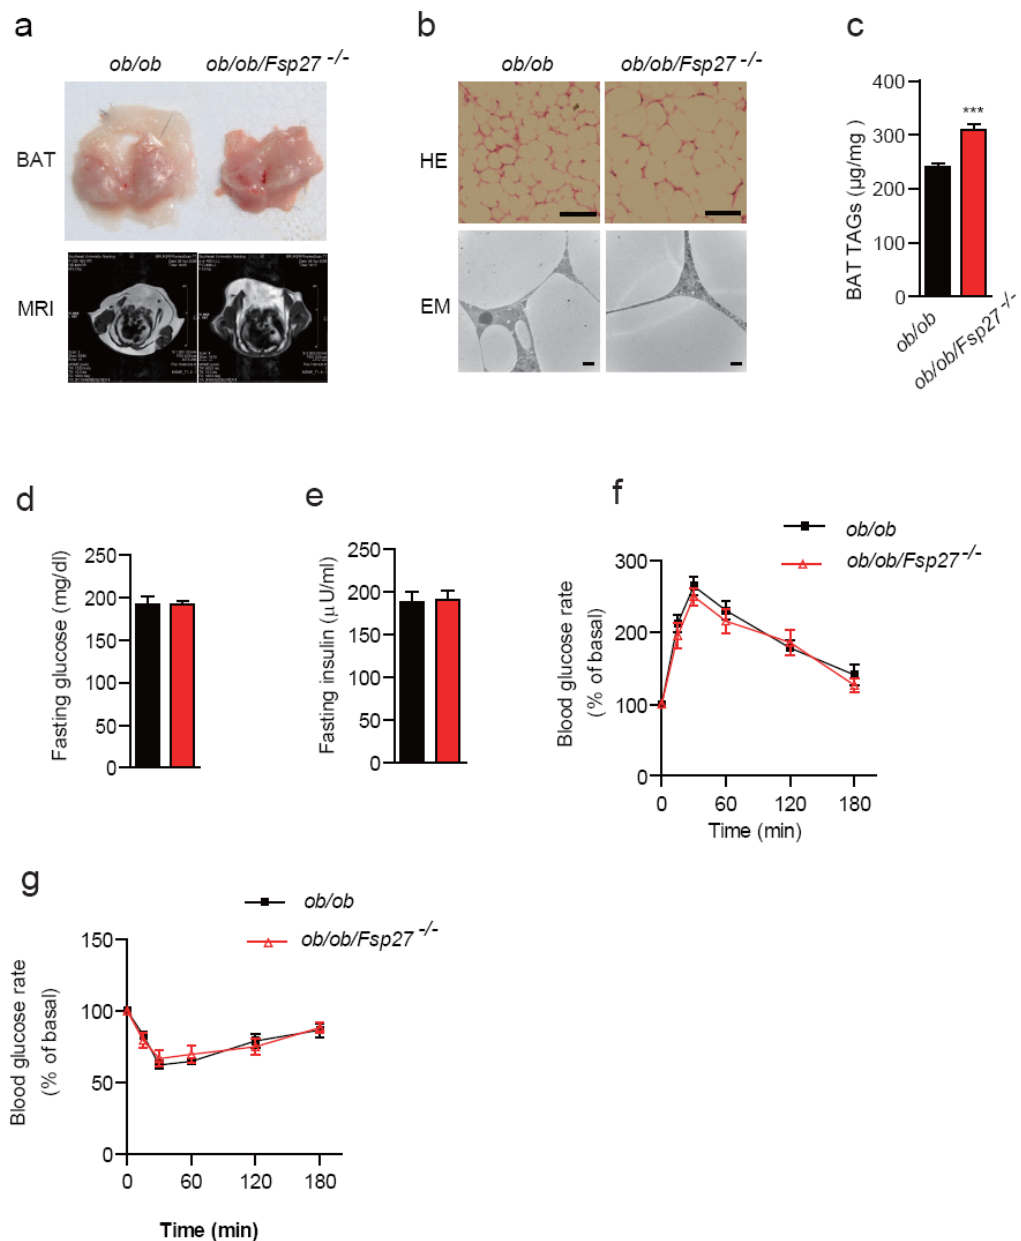

**Supplementary Figure 3: Increased TAG storage in the BAT of *ob/ob/Fsp27<sup>-/-</sup>* mice.** 4 month old chow fed *ob/ob* and *ob/ob/Fsp27<sup>-/-</sup>* mice were used. (a) Photographs (top panel) and MRI analysis of the BAT. (b) Morphology of BAT from *ob/ob* and *ob/ob/Fsp27<sup>-/-</sup>* mice. H&E, hematoxylin and eosin staining. EM, electron microscope image. Scale bar= 64  $\mu\text{m}$  and 2 $\mu\text{m}$  for HE and EM respectively. (c) TAG concentration in the BAT of *ob/ob* and *ob/ob/Fsp27<sup>-/-</sup>* mice (n=5). (d) Fasting glucose and (e) fasting insulin concentrations of chow fed 4 month-old *ob/ob* (n=6) and *ob/ob/Fsp27<sup>-/-</sup>* (n=6) mice. (f) Glucose tolerance tests (GTT) and (g) insulin tolerance tests (ITT) in chow fed 4 month-old *ob/ob* (n=5) and *ob/ob/Fsp27<sup>-/-</sup>* (n=5) mice. Quantitative data are presented as mean  $\pm$  SEM. Significance was established using a 2-tailed Student's t test. Differences were considered significant at  $P < 0.05$ . \*\*\* indicates  $P < 0.001$ .

Supplementary Figure 4

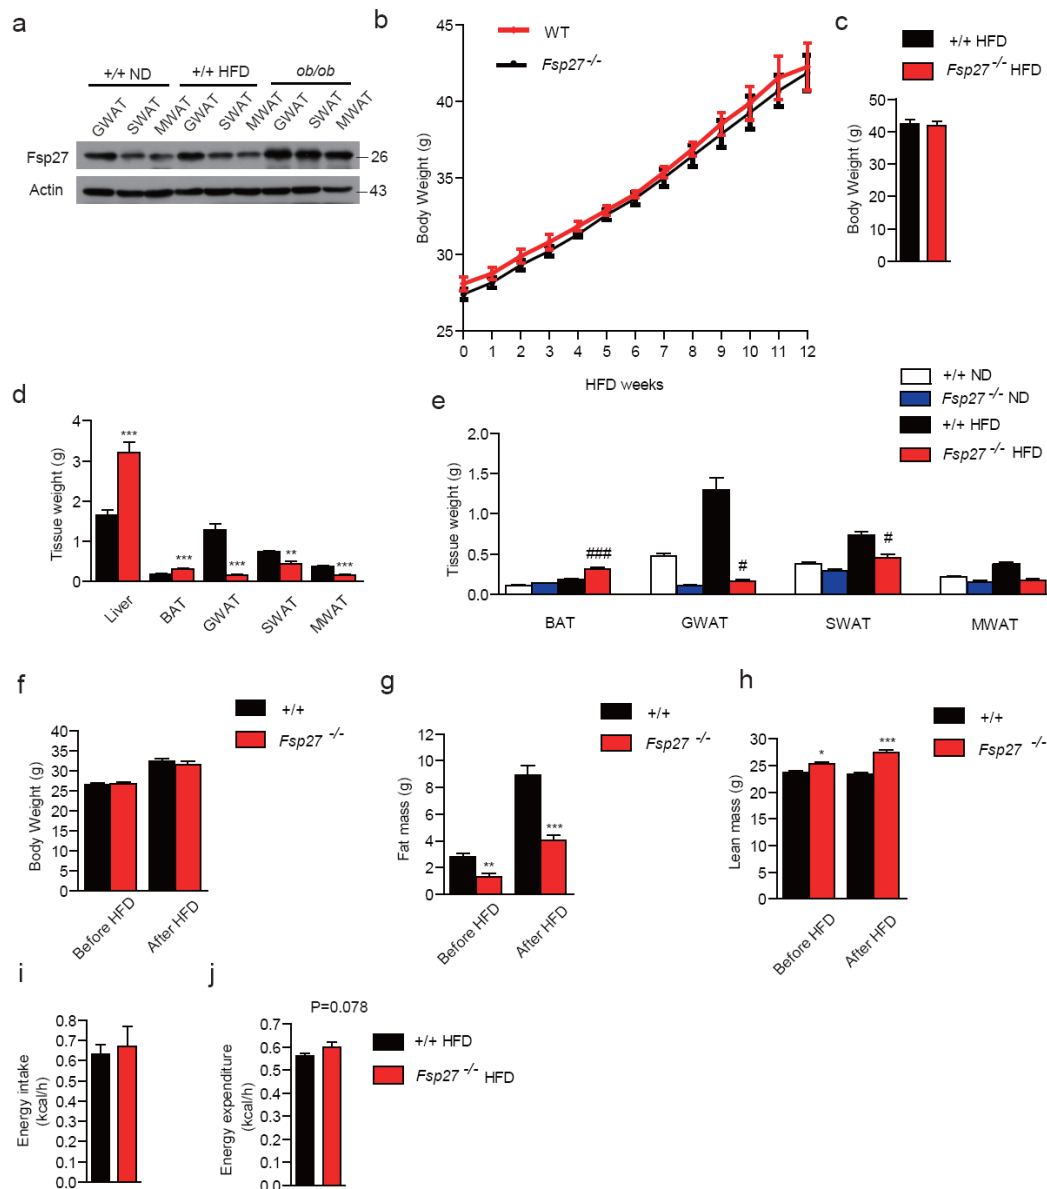

**Supplementary Figure 4: Reduced fat mass in HFD fed *Fsp27*<sup>-/-</sup> mice.** 3 month old WT and *Fsp27*<sup>-/-</sup> mice were fed a chow diet (ND) or challenged with a HFD (D12331, 58% kcal of fat) for 3 months, n=4 per group (a-e). (a) Representative Fsp27 protein expression in gonadal fat (GWAT), subcutaneous fat (SWAT) and mesenteric fat (MWAT) from chow (ND), HFD fed or *ob/ob* mice. (b) Growth curves (body weight) of WT and *Fsp27*<sup>-/-</sup> mice fed with a HFD. (c) Body weight of WT and *Fsp27*<sup>-/-</sup> mice after 3 months on a HFD. (d) Tissue weights of WT and *Fsp27*<sup>-/-</sup> mice on a HFD. (e) Tissue weights of WT and *Fsp27*<sup>-/-</sup> mice fed a chow (ND) or HFD. 3 month old WT and *Fsp27*<sup>-/-</sup> mice were challenged with a HFD (D12492, 60% kcal of fat) for 6 weeks, n=6, (f-j). (f-h) Body weight, fat mass and lean mass of WT and *Fsp27*<sup>-/-</sup> mice on a HFD. (i) Energy intake (j) Energy expenditure of WT and *Fsp27*<sup>-/-</sup> mice on a HFD. Quantitative data are presented as mean  $\pm$  SEM. Significance was established using a 2-tailed Student's t test. Differences were considered significant at P<0.05. \*\*\* indicates P<0.001. # indicates the difference between *Fsp27*<sup>-/-</sup> ND and *Fsp27*<sup>-/-</sup> HFD. # indicates P<0.05, ### indicates P<0.001.

Supplementary Figure 5

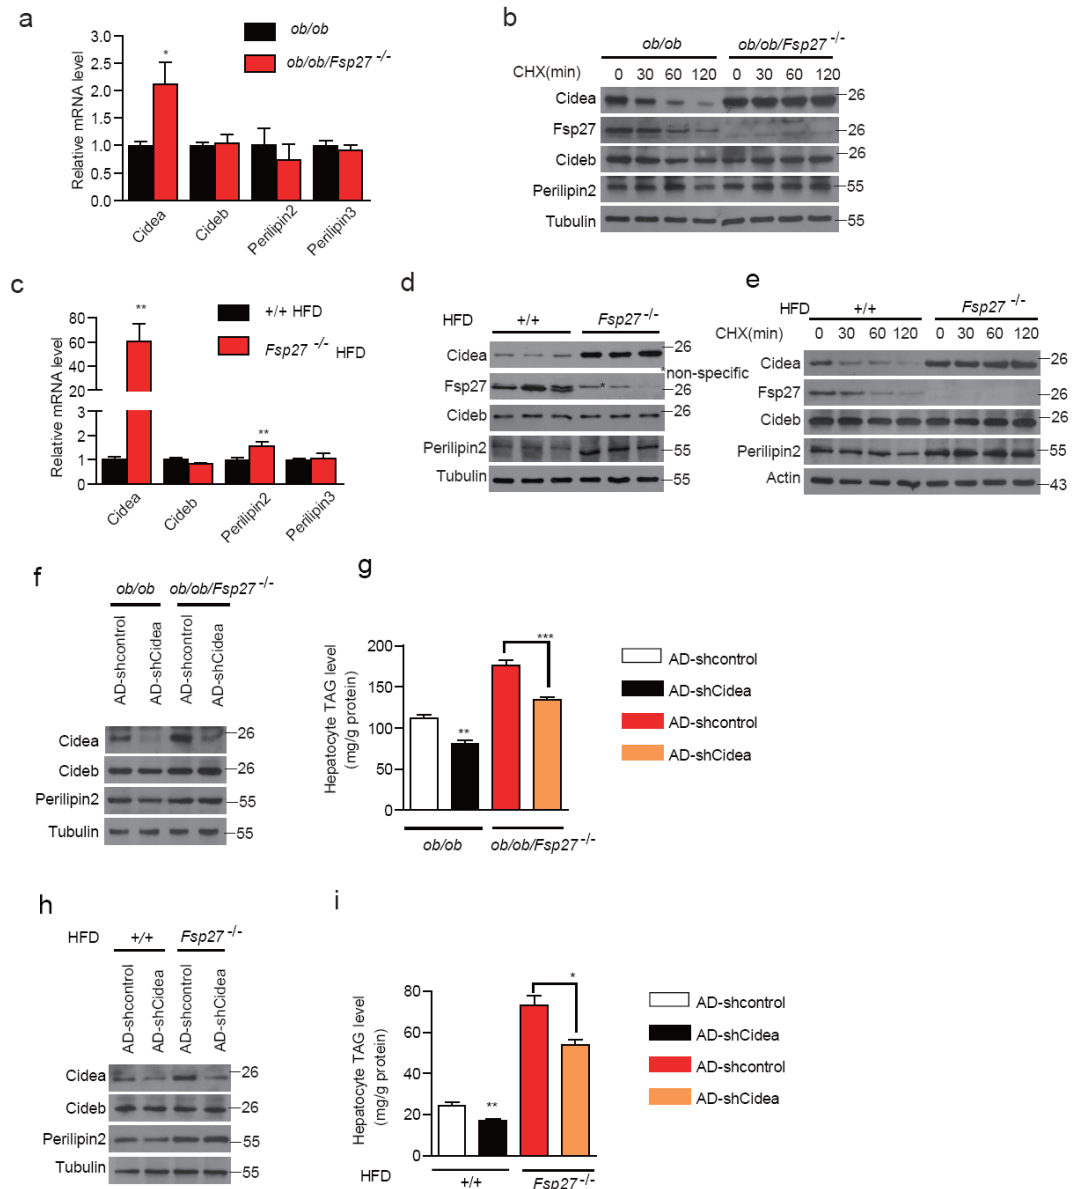

**Supplementary Figure 5: Increased liver Cidea expression in *Fsp27<sup>-/-</sup>* mice on an *ob/ob* background or when fed a HFD.** (a) Relative mRNA expression in the livers of 4 month old chow fed *ob/ob* and *ob/ob/Fsp27<sup>-/-</sup>* mice. (n=4). (b) Protein stability in isolated hepatocytes from 4 month old chow fed *ob/ob* and *ob/ob/Fsp27<sup>-/-</sup>* mice. 3 month old WT and *Fsp27<sup>-/-</sup>* mice were challenged with a HFD (D12331) for 3 months (c-e, h,i). (c) Relative mRNA and (d) protein expression. (e) protein stability in the hepatocytes isolated from HFD fed WT and *Fsp27<sup>-/-</sup>* mice. (f) Protein expression and (g) TAG concentrations in isolated hepatocytes from 4 month old *ob/ob* and *ob/ob/Fsp27<sup>-/-</sup>* mice infected with shCidea or shControl adenoviral vectors (n=4). (h) Protein expression and (i) TAG concentrations in isolated hepatocyte from HFD fed WT and *Fsp27<sup>-/-</sup>* mice treated with shCidea or shControl adenoviral vectors (n=4). Quantitative data are presented as mean  $\pm$  SEM. Significance was established using a 2-tailed Student's t test. Differences were considered significant at  $P < 0.05$ . \* indicates  $P < 0.05$ , \*\* indicates  $P < 0.01$ , \*\*\* indicates  $P < 0.001$ .

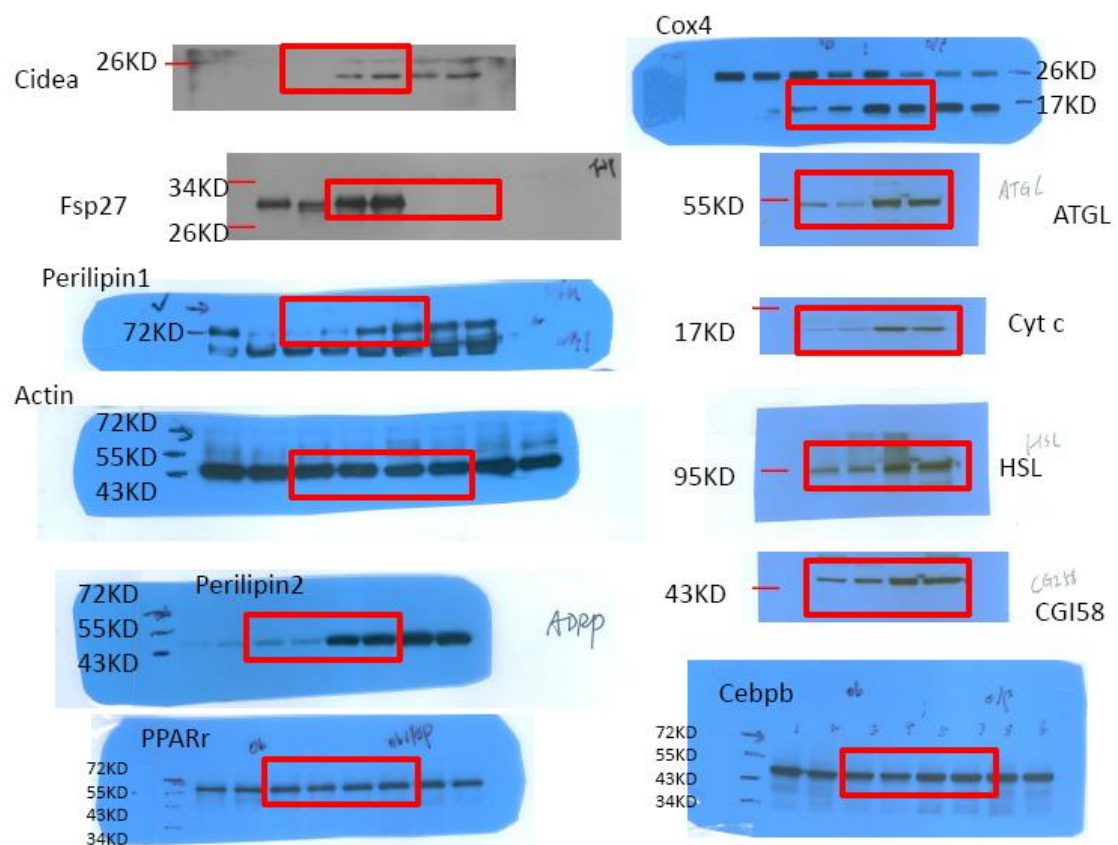

**Supplementary Figure 6: Original western blots for images used in Figure1.**

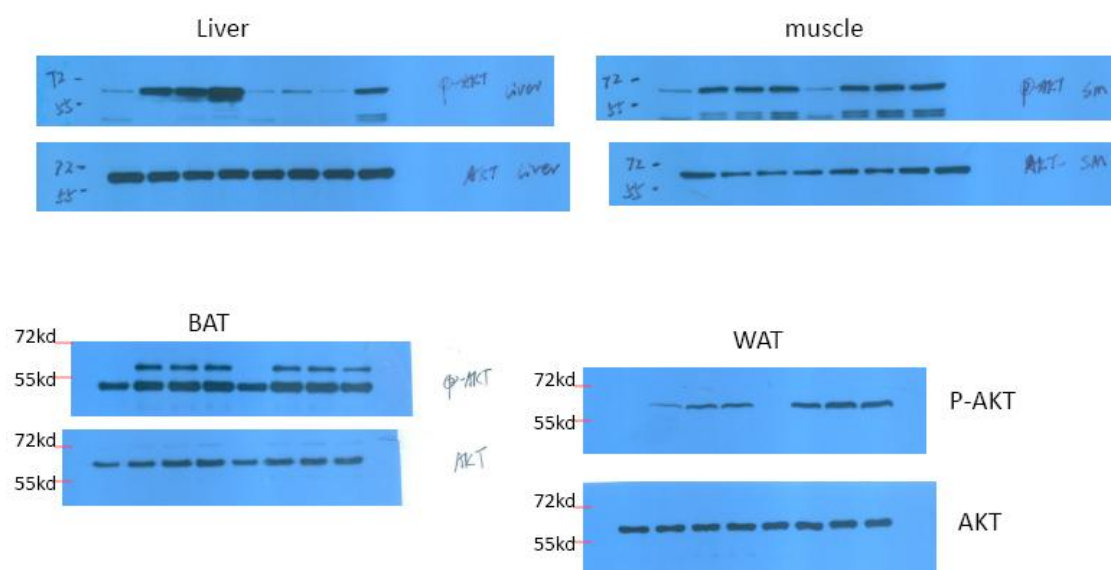

**Supplementary Figure 7: Original western blots for images used in Figure4.**

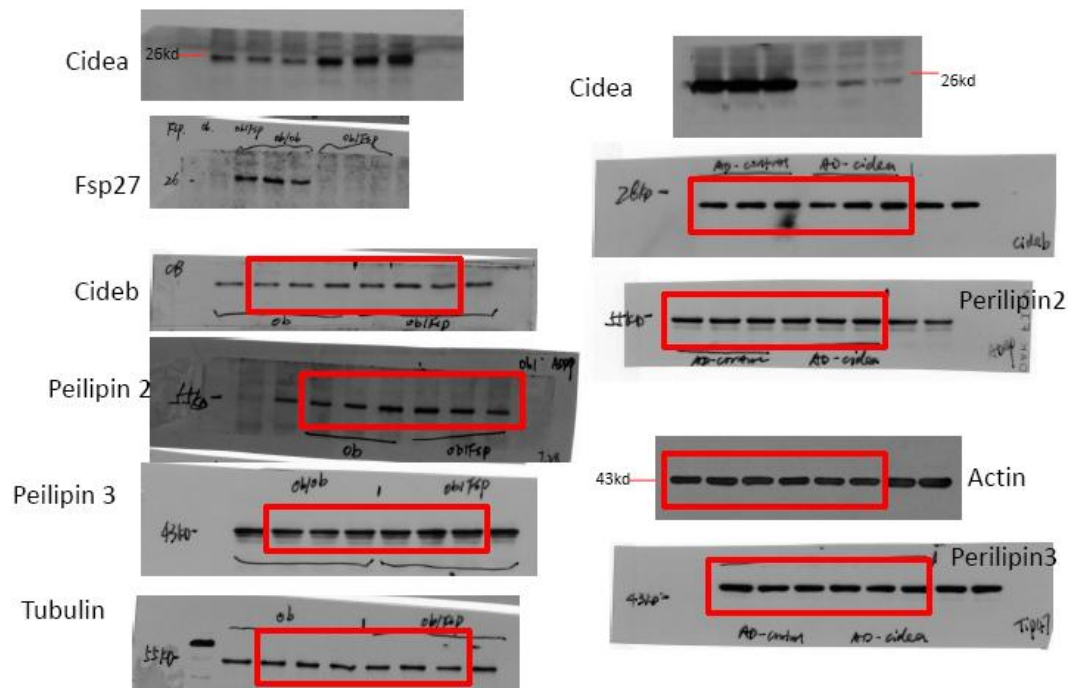

**Supplementary Figure 8: Original western blots for images used in Figure 7.**

Supplementary Table1

*ob/ob/Fsp27<sup>-/-</sup>* vs. *ob/ob*

| Up-Regulated Pathways: LFC > 0.5 && p.val < 0.05   |          |          |       |         |         |
|----------------------------------------------------|----------|----------|-------|---------|---------|
| Pathway                                            | positive | measured | total | %       | Z Score |
| Electron Transport Chain                           | 91       | 100      | 116   | 91.00%  | 21.41   |
| Oxidative phosphorylation                          | 52       | 59       | 65    | 88.14%  | 15.75   |
| TCA Cycle                                          | 27       | 31       | 45    | 87.10%  | 11.22   |
| Fatty Acid Beta Oxidation                          | 26       | 34       | 46    | 76.47%  | 10.02   |
| Fatty Acid Biosynthesis                            | 16       | 22       | 26    | 72.73%  | 7.56    |
| Mitochondrial LC-Fatty Acid Beta-Oxidation         | 13       | 16       | 21    | 81.25%  | 7.39    |
| Amino Acid metabolism                              | 37       | 92       | 205   | 40.22%  | 6.78    |
| Glycolysis and Gluconeogenesis                     | 23       | 48       | 70    | 47.92%  | 6.37    |
| Triacylglyceride Synthesis                         | 13       | 23       | 26    | 56.52%  | 5.55    |
| Adipogenesis                                       | 42       | 132      | 134   | 31.82%  | 5.43    |
| Heme Biosynthesis                                  | 6        | 9        | 21    | 66.67%  | 4.32    |
| Glycogen Metabolism                                | 14       | 34       | 42    | 41.18%  | 4.26    |
| Arachidonate Epoxygenase Epoxide Hydrolase         | 3        | 3        | 13    | 100.00% | 4.1     |
| Nuclear Receptors                                  | 12       | 38       | 38    | 31.58%  | 2.84    |
| Cholesterol Biosynthesis                           | 6        | 15       | 30    | 40.00%  | 2.69    |
| Tryptophan metabolism                              | 12       | 43       | 48    | 27.91%  | 2.35    |
| Diurnally regulated genes with circadian orthologs | 13       | 48       | 48    | 27.08%  | 2.32    |
| One carbon metabolism and related pathways         | 12       | 45       | 86    | 26.67%  | 2.17    |
| Kennedy pathway                                    | 5        | 14       | 29    | 35.71%  | 2.15    |
| Oxidative Stress                                   | 7        | 23       | 29    | 30.43%  | 2.05    |
| Pentose Phosphate Pathway                          | 3        | 7        | 19    | 42.86%  | 2.05    |
| Acetylcholine Synthesis                            | 3        | 7        | 17    | 42.86%  | 2.05    |
| Mitochondrial Gene Expression                      | 6        | 19       | 23    | 31.58%  | 2.01    |

| Down-Regulated Pathways: LFC > 0.5 && p.val < 0.05 |          |          |       |        |         |
|----------------------------------------------------|----------|----------|-------|--------|---------|
| Pathway                                            | positive | measured | total | %      | Z Score |
| B Cell Receptor Signaling Pathway                  | 61       | 155      | 157   | 39.35% | 7.63    |
| Chemokine signaling pathway                        | 63       | 180      | 198   | 35.00% | 6.65    |
| IL-5 Signaling Pathway                             | 30       | 69       | 70    | 43.48% | 5.97    |
| IL-3 Signaling Pathway                             | 37       | 99       | 101   | 37.37% | 5.53    |
| Kit Receptor Signaling Pathway                     | 28       | 67       | 67    | 41.79% | 5.51    |
| T Cell Receptor Signaling Pathway                  | 45       | 132      | 134   | 34.09% | 5.38    |
| Focal Adhesion                                     | 57       | 184      | 192   | 30.98% | 5.24    |
| Toll-like receptor signaling pathway               | 34       | 94       | 98    | 36.17% | 5.07    |
| DNA Replication                                    | 18       | 41       | 47    | 43.90% | 4.66    |
| Cell cycle                                         | 30       | 86       | 90    | 34.88% | 4.52    |
| EGFR1 Signaling Pathway                            | 49       | 174      | 177   | 28.16% | 4.08    |
| G1 to S cell cycle control                         | 22       | 61       | 64    | 36.07% | 4.05    |
| IL-4 signaling Pathway                             | 21       | 61       | 63    | 34.43% | 3.7     |
| Apoptosis                                          | 26       | 83       | 84    | 31.33% | 3.57    |

|                                                |    |     |     |        |      |
|------------------------------------------------|----|-----|-----|--------|------|
| Toll Like Receptor signaling                   | 13 | 33  | 33  | 39.39% | 3.48 |
| Complement and Coagulation Cascades            | 20 | 60  | 64  | 33.33% | 3.44 |
| G13 Signaling Pathway                          | 14 | 38  | 38  | 36.84% | 3.31 |
| Regulation of Actin Cytoskeleton               | 40 | 150 | 157 | 26.67% | 3.28 |
| IL-7 Signaling Pathway                         | 15 | 44  | 45  | 34.09% | 3.08 |
| Type II interferon signaling (IFNG)            | 12 | 33  | 36  | 36.36% | 3.01 |
| MAPK signaling pathway                         | 40 | 157 | 162 | 25.48% | 2.95 |
| Inflammatory Response Pathway                  | 11 | 30  | 32  | 36.67% | 2.92 |
| Complement Activation, Classical Pathway       | 7  | 16  | 18  | 43.75% | 2.89 |
| Prostaglandin Synthesis and Regulation         | 11 | 31  | 40  | 35.48% | 2.79 |
| Hypertrophy Model                              | 8  | 20  | 21  | 40.00% | 2.78 |
| Apoptosis Modulation by HSP70                  | 7  | 17  | 18  | 41.18% | 2.69 |
| TGF-beta Receptor Signaling Pathway            | 37 | 150 | 152 | 24.67% | 2.61 |
| Endochondral Ossification                      | 18 | 62  | 67  | 29.03% | 2.59 |
| Matrix Metalloproteinases                      | 10 | 29  | 30  | 34.48% | 2.55 |
| Small Ligand GPCRs                             | 7  | 18  | 19  | 38.89% | 2.51 |
| Nucleotide Metabolism                          | 7  | 19  | 36  | 36.84% | 2.34 |
| Senescence and Autophagy                       | 25 | 98  | 100 | 25.51% | 2.33 |
| Glucuronidation                                | 5  | 12  | 33  | 41.67% | 2.3  |
| IL-2 Signaling Pathway                         | 20 | 76  | 76  | 26.32% | 2.23 |
| Integrin-mediated cell adhesion                | 24 | 97  | 102 | 24.74% | 2.11 |
| IL-1 Signaling Pathway                         | 11 | 37  | 38  | 29.73% | 2.11 |
| Homologous recombination                       | 5  | 13  | 13  | 38.46% | 2.09 |
| Androgen Receptor Signaling Pathway            | 26 | 109 | 114 | 23.85% | 1.99 |
| Signaling of Hepatocyte Growth Factor Receptor | 10 | 34  | 34  | 29.41% | 1.97 |

**Supplementary Table1: The most significantly up-regulated and down-regulated pathways**

**in the GWAT of *ob/ob/Fsp27<sup>-/-</sup>* mice were identified using Wiki pathway analysis.** The ‘total’ column presents the total number of genes in that particular pathway. The ‘measured’ column provides the number of genes in a particular pathway whose expression differed (using the criteria described above), and the ‘positive’ column has the number of up-regulated or down-regulated genes. The Z score is the standard statistical test under a hypergeometric distribution. The pathways highlighted in green were significantly different in supplementary tables 1 and 2 whereas those in yellow were only different in supplementary table 1 or 2. LFC means log ratio of fold change.

Supplementary Table2

*Fsp27*<sup>-/-</sup> vs. WT

| Up-Regulated Pathways: LFC > 0.5 && p.val < 0.05   |          |          |       |         |         |
|----------------------------------------------------|----------|----------|-------|---------|---------|
| Pathway                                            | positive | measured | total | %       | Z Score |
| Electron Transport Chain                           | 64       | 81       | 116   | 79.01%  | 19.7    |
| Oxidative phosphorylation                          | 37       | 48       | 65    | 77.08%  | 14.65   |
| TCA Cycle                                          | 23       | 27       | 45    | 85.19%  | 12.29   |
| Fatty Acid Beta Oxidation                          | 22       | 30       | 46    | 73.33%  | 10.88   |
| Mitochondrial LC-Fatty Acid Beta-Oxidation         | 12       | 15       | 21    | 80.00%  | 8.5     |
| Amino Acid metabolism                              | 29       | 71       | 205   | 40.85%  | 8.06    |
| Glycolysis and Gluconeogenesis                     | 19       | 36       | 70    | 52.78%  | 7.99    |
| Fatty Acid Biosynthesis                            | 12       | 20       | 26    | 60.00%  | 6.97    |
| Arachidonate Epoxygenase Epoxide Hydrolase         | 3        | 3        | 13    | 100.00% | 4.89    |
| Tryptophan metabolism                              | 10       | 28       | 48    | 35.71%  | 4.15    |
| Synthesis and Degradation of Ketone Bodies         | 2        | 4        | 8     | 50.00%  | 2.47    |
| Eicosanoid Synthesis                               | 4        | 14       | 36    | 28.57%  | 2.08    |
| Nuclear receptors in lipid metabolism and toxicity | 4        | 15       | 40    | 26.67%  | 1.92    |
| Cholesterol Biosynthesis                           | 4        | 15       | 30    | 26.67%  | 1.92    |

| Down-Regulated Pathways: LFC > 0.5 && p.val < 0.05 |          |          |       |         |         |
|----------------------------------------------------|----------|----------|-------|---------|---------|
| Pathway                                            | positive | measured | total | %       | Z Score |
| Cytoplasmic Ribosomal Proteins                     | 45       | 76       | 82    | 59.21%  | 9.56    |
| Complement Activation, Classical Pathway           | 10       | 10       | 18    | 100.00% | 6.8     |
| Complement and Coagulation Cascades                | 16       | 28       | 64    | 57.14%  | 5.46    |
| Focal Adhesion                                     | 45       | 128      | 192   | 35.16%  | 5.25    |
| Estrogen metabolism                                | 7        | 10       | 29    | 70.00%  | 4.32    |
| Inflammatory Response Pathway                      | 9        | 16       | 32    | 56.25%  | 4.03    |
| Glucuronidation                                    | 7        | 11       | 33    | 63.64%  | 3.98    |
| Endochondral Ossification                          | 16       | 41       | 67    | 39.02%  | 3.57    |
| Senescence and Autophagy                           | 25       | 76       | 100   | 32.89%  | 3.48    |
| Aflatoxin B1 metabolism                            | 3        | 4        | 11    | 75.00%  | 2.99    |
| Myometrial Relaxation and Contraction Pathways     | 29       | 102      | 161   | 28.43%  | 2.85    |
| Dopaminergic Neurogenesis                          | 4        | 7        | 32    | 57.14%  | 2.72    |
| Striated Muscle Contraction                        | 7        | 16       | 45    | 43.75%  | 2.72    |
| Prostaglandin Synthesis and Regulation             | 9        | 23       | 40    | 39.13%  | 2.68    |
| Hypertrophy Model                                  | 6        | 13       | 21    | 46.15%  | 2.67    |
| Regulation of Actin Cytoskeleton                   | 25       | 93       | 157   | 26.88%  | 2.32    |
| SHH, FGF8, Stat3                                   | 1        | 1        | 6     | 100.00% | 2.15    |
| Glucocorticoid & Mineralcorticoid Metabolism       | 1        | 1        | 31    | 100.00% | 2.15    |
| Irinotecan Pathway                                 | 4        | 9        | 13    | 44.44%  | 2.09    |
| Ptfla related regulatory pathway                   | 3        | 6        | 14    | 50.00%  | 2.06    |
| TGF Beta Signaling Pathway                         | 11       | 36       | 52    | 30.56%  | 2.01    |
| Alpha6-Beta4 Integrin Signaling Pathway            | 14       | 49       | 67    | 28.57%  | 1.98    |

**Supplementary Table2: The most significantly up-regulated and down-regulated pathways in the GWAT of *Fsp27*<sup>-/-</sup> mice were identified using Wiki pathway analysis. Data is presented in the same manner as in Supplementary table 1.**

**Supplementary Table 3: Sequences of primers used for qRT-PCR analysis.**

|               | Forward (5'-3')          | Reverse(5'-3')           |
|---------------|--------------------------|--------------------------|
| Actin         | GGCTGTATTCCCCTCCATCG     | CCAGTTGGTAACAATGCCATGT   |
| ACC1          | AGCTGATCCTGCGAACCT       | GCCAAGCGGATGTAACT        |
| FAS           | TCCAAGACTGACTCGGCTACTGAC | GCAGCCAGGTTCGGAATGCTATC  |
| SCD1          | TTCTTGCGATACACTCTGGTGC   | CGGGATTGAATGTTCTTGTCGT   |
| Elovl6        | AAGCAGTTCAACGAGAACGAA    | CGTACAGCGCAGAAAACAGG     |
| DGAT1         | TCCGTCCAGGGTGGTAGTG      | TGAACAAAGAATCTTGACAGCA   |
| DGAT2         | CTGGCTGATAGCTGCTCTACTTC  | TGTGATCTCCTGCCACCTTTC    |
| SREBP1c       | GGAGCCATGGATTGCACATT     | GCTTCCAGAGAGGAGGCCAG     |
| SREBP2        | CCCTTGACTTCCTTGCTGCA     | GCGTGAGTGTTGGCGAATC      |
| Pparg         | TTGACAGGAAAGACAACGGAC    | CTTCTACGGATCGAAACTGG     |
| Ppara         | ACGGCAATGGCTTTATCA       | CGCTGCGTCGGACTCGGT       |
| LXR $\alpha$  | ATGTCCACGAGTGACTGTT      | TTGACTCTCCCTTAATGCTAC    |
| LXR $\beta$   | TATGCCTTGCTTATGCCATC     | CTTGTCTGGAGTCGCAATG      |
| CPT1          | ACCACTGGCCGCATGT         | CTCCATGGCGTAGTAGTTGCT    |
| CPT2          | CAGCACAGCATCGTACCCA      | TCCCAATGCCGTTCTCAAAAT    |
| Cox4          | CGGCGTGACTACCCCTTG       | TGAGGGATGGGGCCATACA      |
| Cyto C        | CCAAATCTCCACGGTCTGTTC    | ATCAGGGTATCCTCTCCCAG     |
| Acadl         | GCATCAACATCGCAGAGAAA     | ACGCTTGCTCTTCCAAGTA      |
| Acadm         | GCTAGTGGAGACCAAGGAG      | CCAGGCTGCTCTCTGGTAAC     |
| Pck1          | GAAGGACAAAGATGGCAAGTT    | CGTTTTCTTAGGGATGTAGC     |
| G6pc          | CTGAGCGCGGGCATCATAAT     | GATTCTTAGGATCGCCAGAAAG   |
| CRP           | ATGGAGAAGCTACTCTGGTGC    | ACACACAGTAAAGGTGTTCACTG  |
| IL-1 $\beta$  | GCAACTGTTCTGAACTCAACT    | ATCTTTGGGGTCCGTCAACT     |
| CD11c         | ACACAGTGTGCTCCAGTATGA    | GCCCAGGGATATGTTACAGC     |
| F4/80         | CTTTGGCTATGGGCTTCCAGTC   | GCAAGGAGGACAGAGTTTATCGTG |
| MCP1          | AGGTCCTGTGTCGTTCTG       | GCTGCTGGTGATCCTCTTGT     |
| MIP1 $\alpha$ | TTCTCTGTACCATGAACTCTGC   | CGTGGAATCTTCGGCTGTAG     |
| TNF $\alpha$  | CCAGACCCTCAGACTCAGATC    | CACTTGGTGGTTTGCTACGAC    |
| SAA3          | CCTGGGCTGCTAAAGTCATC     | ACCCAGTAGTTGCCCTCTT      |
| IL-4          | ATGGAGCTGCAGAGACTCTT     | AAAGCATGGTGGCTCAGTAC     |

|             |                         |                         |
|-------------|-------------------------|-------------------------|
| IL-6        | CCAGAGATACAAAGAAATGATGG | ACTCCAGAAGACCAGAGGAAAT  |
| IL-10       | TGAATTCCCTGGGTGAGAAG    | TCACTCTTCACCTGCTCCACT   |
| IL-18       | GACTCTTGCGTCAACTTCAAGG  | CAGGCTGTCTTTGTCAACGA    |
| Arg1        | ATGGAAGAGACCTTCAGCTAC   | GCTGTCTTCCAAGAGTTGGG    |
| Ym1         | GGGCATACCTTTATCTGAG     | CCACTGAAGTCATCCATGTC    |
| Adiponectin | TGTTCTCTTAATCCTGCCA     | CCAACCTGCACAAGTCCCTT    |
| Cidea       | TCCTCGGCTGTCTCAATG      | TGGCTGCTCTTCTGTATCG     |
| Cideb       | TCTGTGATCATAAGCGGACA    | GCAGCAGCGAGGAAGTCAA     |
| Perilipin2  | GATTGAATTCGCCAGGAAGA    | TGGCATGTAGTCTGGAGCTG    |
| Perilipin3  | CTGAGAAAGGCGTCAAGACC    | TTTCTTGAGCCCCAGACACT    |
| ASC         | CTTGTCAGGGGATGAACTCAAAA | GCCATACGACTCCAGATAGTAGC |
| NLRP3       | ATTACCCGCCCGAGAAAGG     | TCGCAGCAAAGATCCACACAG   |
| Caspase-1   | ACAAGGCACGGGACCTATG     | TCCCAGTCAGTCTGGAAATG    |
| TXNIP       | TCTTTGAGGTGGTCTTCAACG   | GCTTTGACTCGGGTAACTCACA  |
